# Supplementary material
Source: HighWire-hosted journal article supplement (https://jitc.bmj.com/content/13/2/e009852)
Supplement: inline-supplementary-material-1 [file inline-supplementary-material-1.pdf]

A

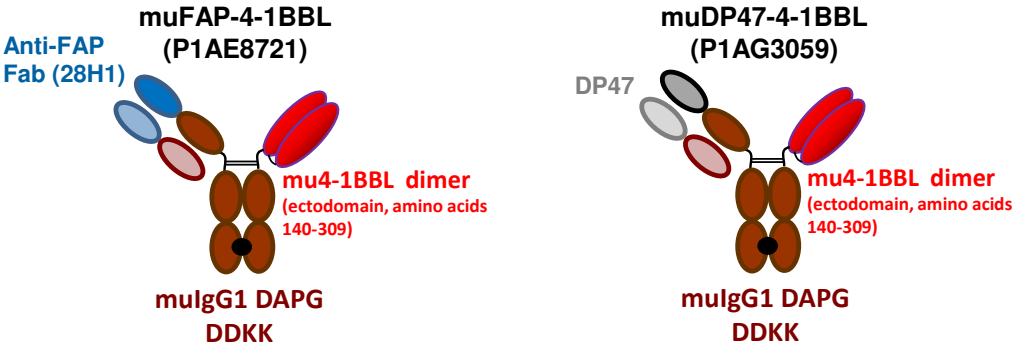

**Supplemental Figure 1. Design of mouse surrogate for FAP-4-1BBL and its non-targeted control.** (A) The mouse surrogate for FAP-4-1BBL (RG7826) is an antibody-like fusion protein consisting of a mouse IgG1  $\kappa$  backbone. The Fc fragment is Fc $\gamma$ -Receptor silenced by D265A P329G (DAPG) mutations and contains a charged aminoacid pairs (DD-KK) to improve molecule assembly [54]. The left arm is a Fab-domain binding either to mouse/human/cynomolgus monkey FAP (clone 28H1) whereas the other arm consists of the dimeric mouse 4-1BBL ectodomain amino acids 140-309 [55]. Mouse 4-1BBL forms naturally a dimer and not a trimer as human 4-1BBL. The non-targeted control has instead of the FAP-binder a germline clone DP47 implemented. This arm should not bind to a specific target and therefore the control molecule is not targeted to the tumor tissue. It therefore can only lead to a dimerization of the 4-1BB receptor on cells.
