# Supplementary material
Source: HighWire-hosted journal article supplement (https://jitc.bmj.com/content/13/2/e009852)
Supplement: inline-supplementary-material-4 [file inline-supplementary-material-4.pdf]

A

PT: 1.5·10<sup>5</sup> TS/A cells + 5·10<sup>5</sup> GFP<sup>+</sup> CAF cells

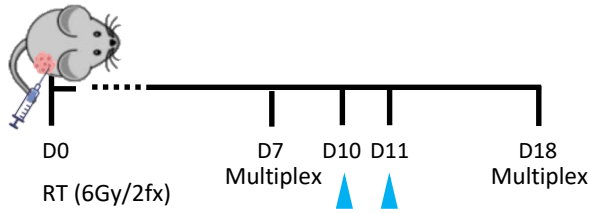

B

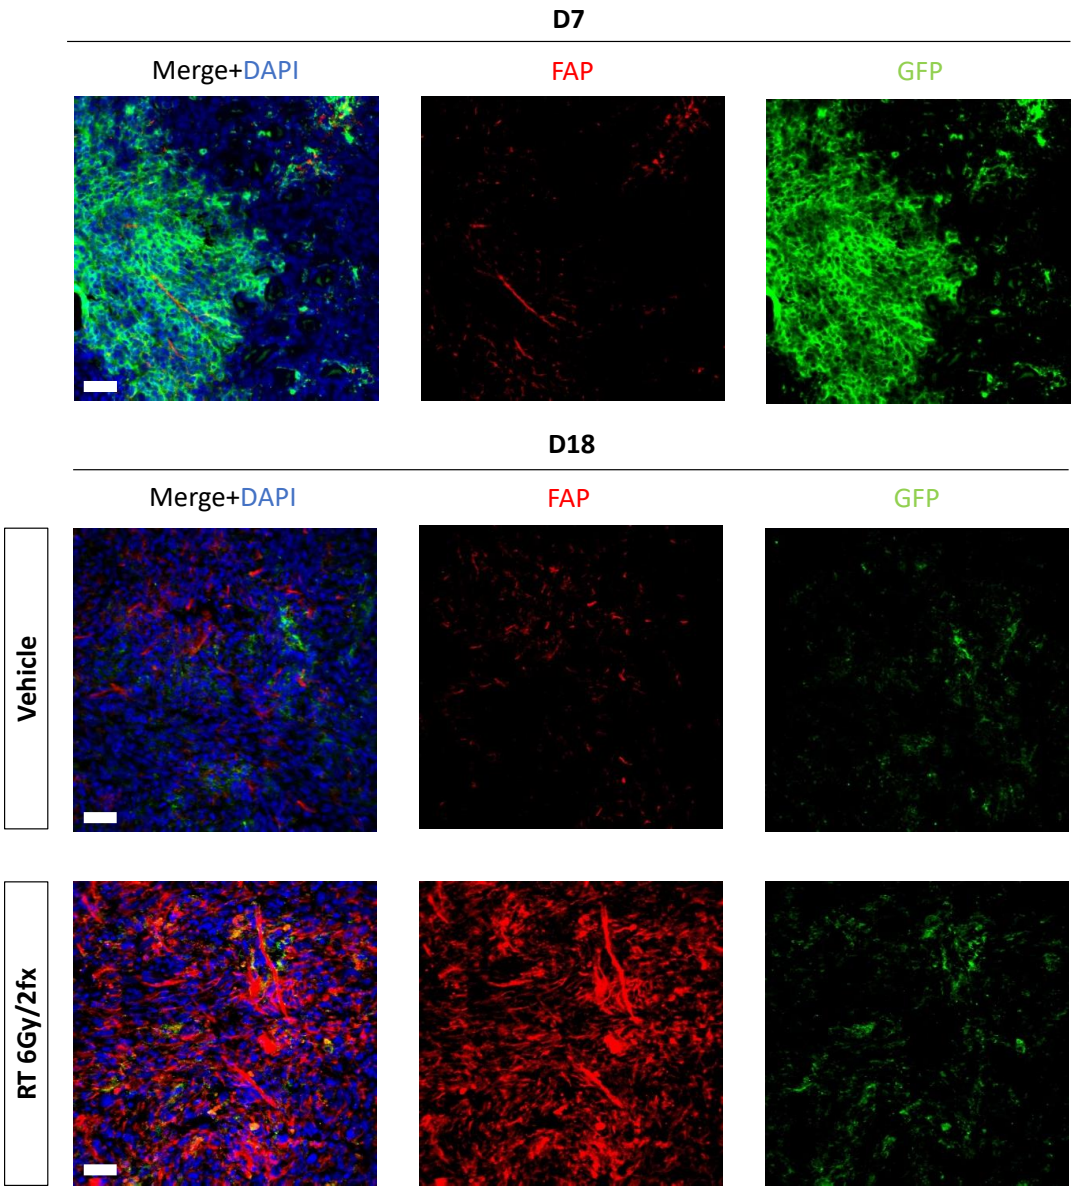

**Supplemental Figure 3. Irradiation induces endogenous FAP<sup>+</sup> CAF recruitment into the tumors.** (A) Scheme of TS/A+CAF-GFP<sup>+</sup> tumor co-engraftment in mice. At day 10 the tumors of one group of mice were treated with hypofractionated therapy (RT, blue arrows). Tumors were excised at day 7 (pre-RT) or at day 18 (non-treated as “Vehicle” and irradiated as “RT”) (n=3 mice/group). (B) Immunofluorescence studies at day 7 (pre-RT) or day 18 (non-treated as “Vehicle” and irradiated as “RT”) staining DAPI (blue), CAF marker FAP (red) and GFP (green). The images show the representative image (scale bar 20 μm).
