# Supplementary material
Source: HighWire-hosted journal article supplement (https://jitc.bmj.com/content/13/2/e009852)
Supplement: inline-supplementary-material-5 [file inline-supplementary-material-5.pdf]

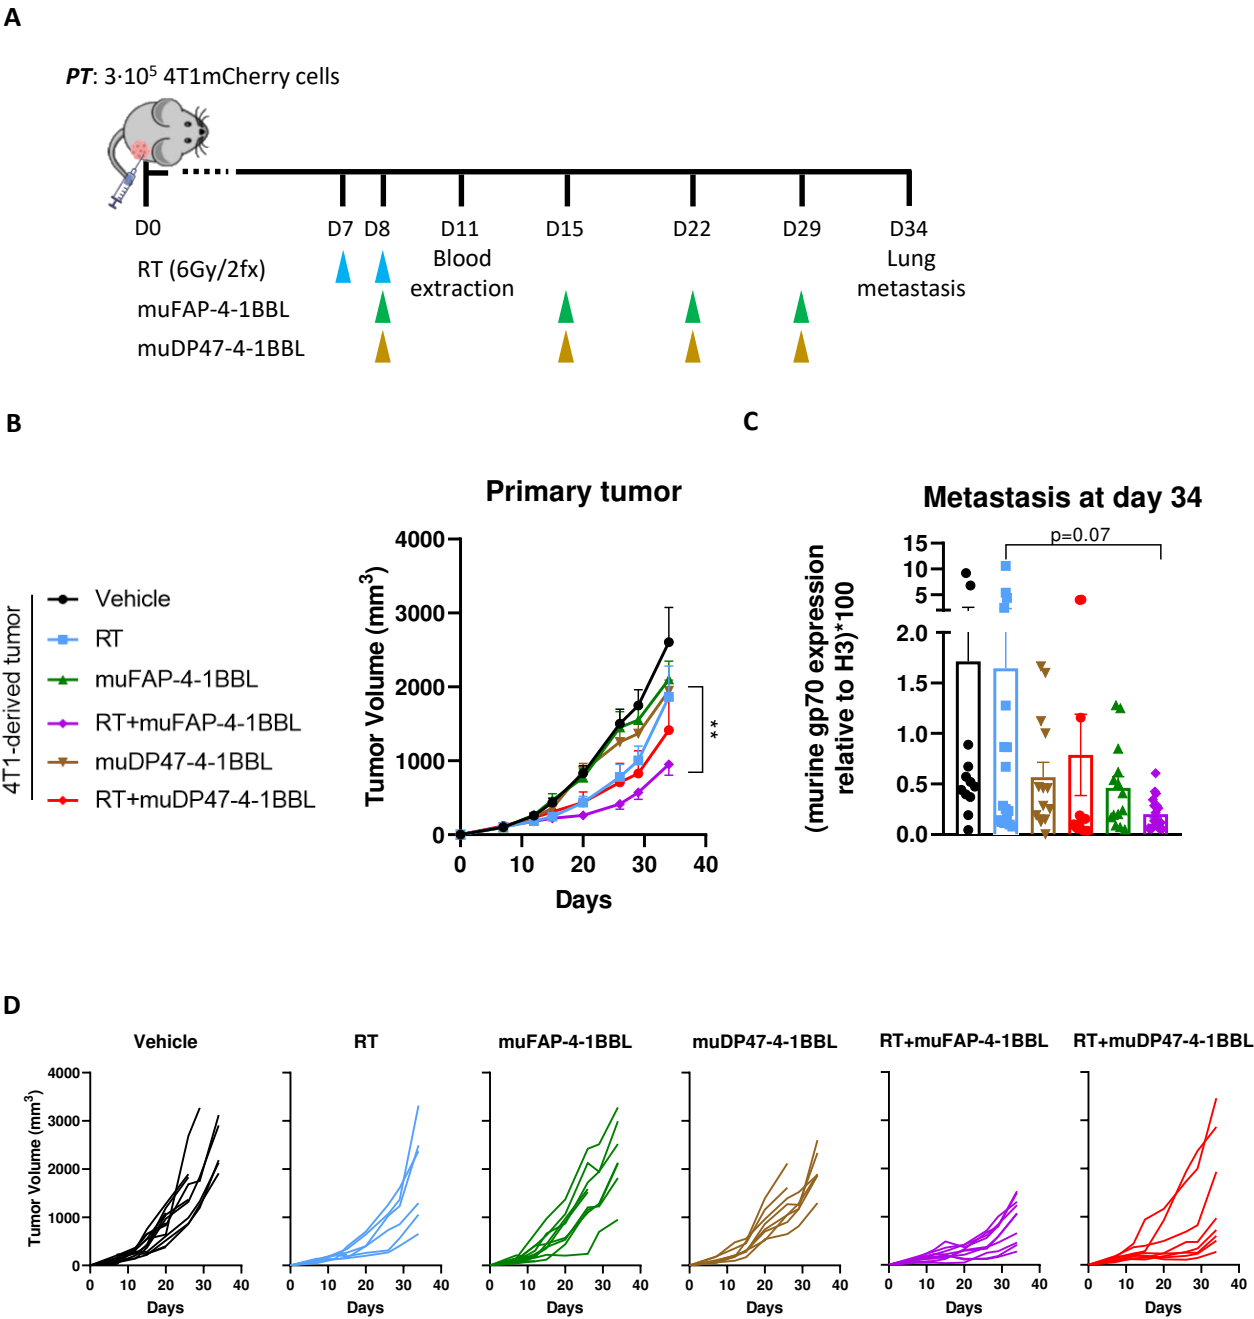

**Supplemental Figure 4. muFAP-4-1BBL synergizes with local radiotherapy and reduces metastasis of 4T1-mCherry-derived tumors.** (A) Scheme of 7-day 4T1-mCherry tumor engraftment and subsequent treatments with hypofractionated radiotherapy (RT, blue arrows) followed by a treatment with intraperitoneal administration of muFAP-4-1BBL (green arrows) or DP47-4-1BBL (brown arrows). Tumor size of the subcutaneous primary tumor was monitored by caliper measurements and at day 34 lungs were excised for gp70 RT-PCR to monitor lung metastasis burden. (B) Tumor growth of the subcutaneous growing primary tumor over time shown as means  $\pm$  SEM for each group (Two-way ANOVA);  $**p < .01$ . (C) Relative gp70 mRNA expression to housekeeping Histone H3 mRNA expression measured by RT-PCR at day 34 as an indicator of lung metastasis burden. Each symbol represents one mouse and means  $\pm$  SEM are indicated (One-way ANOVA). (D) Individual tumor size growth over time. Each blot is one treatment group as indicated (n=7-12 mice/group). Pooled data from two independent experiments.
