# Supplementary material
Source: HighWire-hosted journal article supplement (https://jitc.bmj.com/content/13/2/e009852)
Supplement: inline-supplementary-material-8 [file inline-supplementary-material-8.pdf]

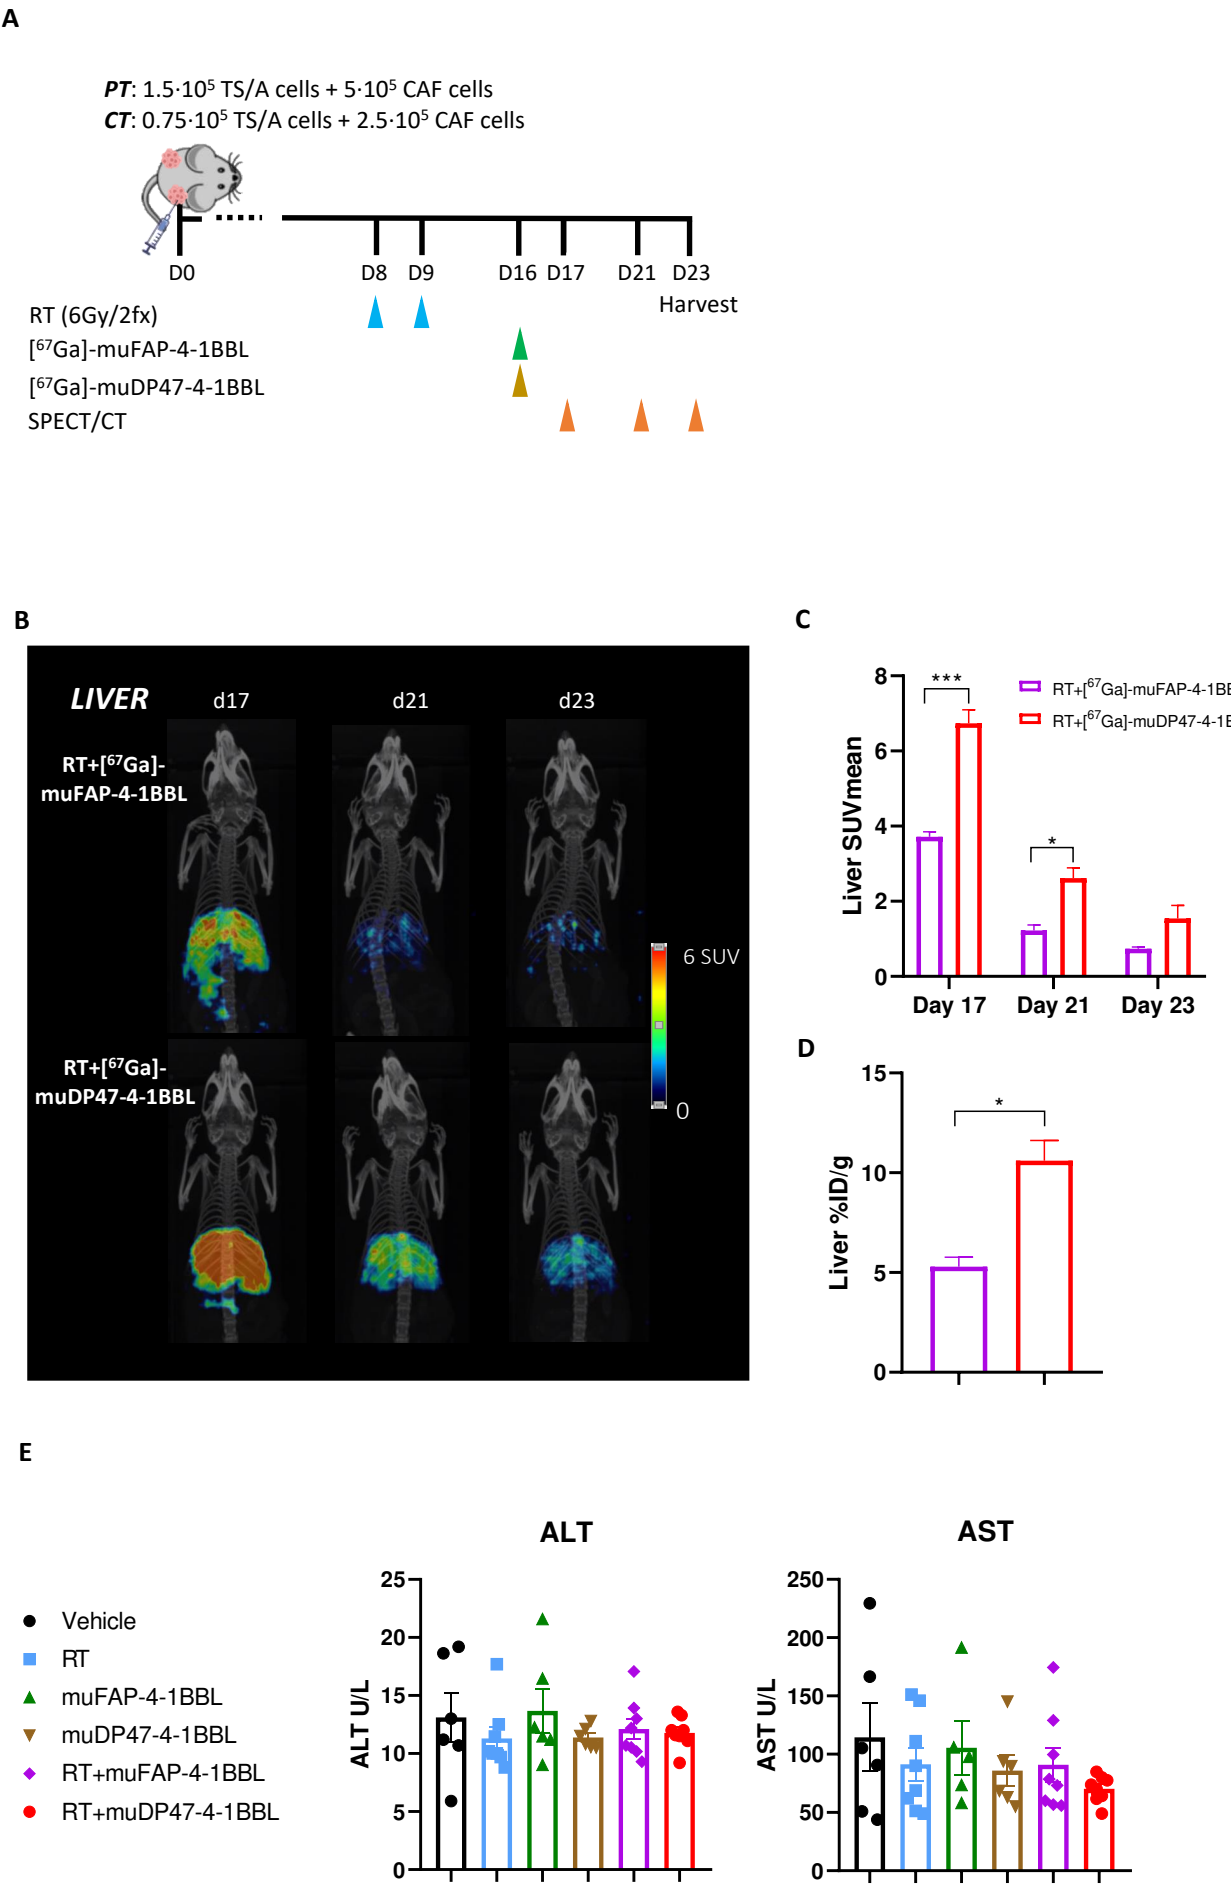

**Supplemental Figure 7. Non-targeted 4-1BB agonist accumulates in the liver in contrast with FAP-targeted 4-1BBL.** (A) Schematic representation of radiolabeling assay in which TS/A+CAF tumor bearing mice received radiotherapy (RT, blue arrows) of the primary tumor (PT) but not contralateral tumor (CT). For combination treatment mice received additionally muFAP-4-1BBL (green arrow) or DP47-4-1BBL (brown arrow) labeled with [ $^{67}\text{Ga}$ ] as indicated. *In vivo* biodistribution analysis measuring radioactivity performed by SPECT/CT images obtained in vivo (day 17, 21 and 23) and ex vivo by harvesting at day 23 (orange arrows). (B) SPECT/CT images showing the mean of standardized uptake values (SUV) of coronal sections measured at day 17, 21 and 23 of mice treated with RT+muFAP-4-1BBL or RT+muDP47-4-1BBL. (C) Quantification of [ $^{67}\text{Ga}$ ]-DP47-1BBL and [ $^{67}\text{Ga}$ ]-FAP-1BBL meanSUV as mean  $\pm$  SEM in the liver (n=3 mice/group) (Two-way ANOVA) \* $p < .05$ , \*\*\* $p < .001$ . (D) Ex vivo biodistribution analysis at day 23 performed by gamma counter and displayed as percent of injected dose per gram of liver (%ID/g) of indicated mice (n=2 mice/group, mean  $\pm$  SEM), (t-test one-tailed); \* $p < .05$ . (E) Transaminase levels (ALT and AST) measured in serum 72h after first dose of therapy of indicated groups in 4T1-mCherry engrafted tumors (n=6-8 mice/group). Each symbol represents one mouse, shown is the mean  $\pm$  SEM.
